# Supplementary material
Source: PubMed Central journal article supplement (PMC4106337)
Supplement: supp_M113.544494_jbc.M113.544494-1.pdf [file supp_M113.544494_jbc.M113.544494-1.pdf]

**Supplementary Table 1 Sequences of siRNA used in this study**

| Gene symbol          | Sense (5'-3')               | Antisense (5'-3')           |
|----------------------|-----------------------------|-----------------------------|
| gp46                 | GUUCCACCAUAAGAUGGUAGACAACAG | GUUGUCUACCAUCUUAUGGUGGAACAU |
| gp46 (2)             | GGACAGGCCUCUACAACUAtt       | UAGUUGUAGAGGCCUGUCtt        |
| GFP                  | from Ambion (#AM4626)       |                             |
| MMP2                 | CCACUACGCUUUUCUGAAtt        | UUCGAGAAAAGCGUAGUGGag       |
| MMP9                 | GAAGUUCUCGAAUCACGGAtt       | UCCGUGAUUCGAGAACUUCca       |
| MMP12                | CUCACUUACAGGAUCUAUAtt       | UAUAGAUCUGUAAGUGAGat        |
| MMP23                | CUGCUUCGAUGGUCCUACAtt       | UGUAGGACCAUCGAAGCAGtg       |
| MT1-MMP              | GCAAAGGUUCUAUGGUUUAtt       | UAAACCAUAGAACCUUUGCat       |
| integrin $\alpha$ 1  | GGACUGCAGUAGUACGUGUtt       | ACACGUACUACUGCAGUCctg       |
| integrin $\alpha$ 2  | GCCGAGAUCGAUACGCAUAtt       | UAUGCGUAUCGAUCUCGGCtg       |
| integrin $\alpha$ 5  | CAUUCAUUUUGACAGCAAAtt       | UUUGCUGUCAAAUUGAAUGgt       |
| integrin $\alpha$ 8  | GCGAUUAAGACAUCGGUUAtt       | UAACCGAUGUCUUAUCGCtg        |
| integrin $\alpha$ 11 | GAGACUUUUCUAAACGAAAtt       | UUUCGUUUAGAAAAGUCUCtg       |
| integrin $\alpha$ V  | CAUUCUCCAUUACGACAUUtt       | AAUGUCGUAAUGGAGAAUGta       |
| integrin $\beta$ 1   | GGACGGAUCUGAUGAAUGAtt       | UCAUUCAUCAGAUCGUCca         |
| integrin $\beta$ 3   | CGUUGAUGC UUACGGGAAAtt      | UUUCCCGUAAGCAUCAACGat       |
| integrin $\beta$ 5   | GCGUUAUGAUGUUCAGCUAtt       | UAGCUGAACAUCAUAACGCag       |
| Fibronectin          | CCGUGGUCCUAACAAAUCUtt       | AGAUUUGUUAGGACCACGGcg       |
