# Supplementary material
Source: PubMed Central journal article supplement (PMC4106337)
Supplement: supp_M113.544494_jbc.M113.544494-2.pdf [file supp_M113.544494_jbc.M113.544494-2.pdf]

**Supplementary Table 2 Sequences of primer used in this study**

| Gene symbol          | Forward primer (5'-3') | Reverse primer (5'-3') |
|----------------------|------------------------|------------------------|
| TIMP-1               | GGGCTAAATTCATGGGTTCC   | ACAGCGTCGAATCCTTTGAG   |
| MMP2                 | GGACAGTGACACCACGTGAC   | GCGAAGAACACAGCCTTCTC   |
| MMP9                 | CAATCCTTGCAATGTGGATG   | GACCGTCCTTGAAGAAATGC   |
| MMP12                | ACGATGTGAGGCAGGAACTC   | TCCAATTGGTAGGCTCCTTG   |
| MMP23                | AGCTCAGGGAAATGTGGATG   | GAGGTTGAAGTGGTCCCAAC   |
| MT1-MMP              | CTTCCGAGAAGTGCCCTATG   | GGAAACCCTCAGCAAACAAG   |
| integrin $\alpha$ 5  | CAAGCTCGGCTTCTTCAAAC   | CGGACTGGCTCTTCAGAATC   |
| integrin $\alpha$ 8  | AGCAGATTACGTTGGGATCG   | CAAGGTCACACACCACCATC   |
| integrin $\alpha$ 11 | AAGATGCCGTCCATGAGTTC   | GGGTTTCAGTCCCTCCTCTC   |
| integrin $\beta$ 5   | GTGAGGAAGCAGAGGGTGTC   | CCGATCTTCTCCTTGCAGAC   |
| Fibronectin          | GCGACTCTGACTGGCCTTAC   | CAACCTCTTCTCGGACCTTG   |
| GAPDH                | ACCATCTTCCAGGAGCGAGA   | GCATGGACTGTGGTCATGAG   |
