# Supplementary material
Source: PubMed Central journal article supplement (PMC4106337)
Supplement: supp_M113.544494_jbc.M113.544494-3.pdf [file supp_M113.544494_jbc.M113.544494-3.pdf]

**Supplementary Table 3 Expression profiles of MMPs in aHSCs**

Expression intensity values of MMP genes in aHSCs were analyzed using SurePrint G3 Rat GE 8x60K Microarray (Agilent Technologies). Values were expressed as a means±SD of 3 independent experiments. Transcript Profiling of microarray data was submitted (accession number: E-MTAB-2081, <http://www.ebi.ac.uk/arrayexpress/>). For reference, values of HSC-2 cell line obtained from database of ArrayExpress (<http://www.ebi.ac.uk/arrayexpress/>) were listed. Substrates and inhibitors (TIMPs) corresponding to each MMP were also listed for reference.

| Gene symbols | Expression intensity value | Data base             | Substrate (ECM)                | Inhibition by |
|--------------|----------------------------|-----------------------|--------------------------------|---------------|
|              | aHSC                       | Rat (HSC-2 cell line) |                                |               |
| MT1-MMP      | 51864±4797                 | 7048                  | Collagen I                     | TIMP-2        |
| MMP12        | 39958±17141                | 26                    | Elastin                        |               |
| MMP2         | 34387±3689                 | 6436                  | Gelatin                        | TIMP-1        |
| MMP23        | 19157±421                  | 1936                  | Gelatin                        | TIMP-1        |
| MMP17        | 3426±302                   | 99                    | Gelatin                        |               |
| MMP7         | 1179±1298                  | 34                    | Collagen I, Gelatin            | TIMP-1        |
| MMP3         | 853±250                    | 20                    | Collagen telopeptides, Gelatin | TIMP-1        |
| MMP16        | 746±92                     | 832                   | Gelatin                        | TIMP-2        |
| MMP28        | 624±17                     | 55                    |                                |               |
| MMP9         | 490±262                    | 20                    | Gelatin                        | TIMP-1        |
| MMP19        | 447±38                     | 220                   | Gelatin                        |               |
| MMP15        | 287±42                     | 33                    | Fibronectin, Laminin           | TIMP-2        |
| MMP10        | 81±24                      | 22                    | Gelatin                        |               |
| MMP24        | 63±16                      | 40                    | Gelatin                        |               |
| MMP11        | 57±15                      | 399                   | Gelatin                        |               |
| MMP13        | 13±3                       | 20                    | Collagen I, Gelatin            |               |
| MMP8         | 5±1                        | 20                    | Collagen I, II, III, aggrecan  |               |
| TIMP-1       | 88665±7294                 | 3384                  |                                |               |
| TIMP-2       | 219456 ±2030               | 5246                  |                                |               |
