# Supplementary material
Source: PubMed Central journal article supplement (PMC4106337)
Supplement: supp_M113.544494_jbc.M113.544494-4.pdf [file supp_M113.544494_jbc.M113.544494-4.pdf]

**Supplementary Table 4 Expression profiles of integrins in aHSCs**

Expression intensity values of integrin genes in aHSCs were analyzed using SurePrint G3 Rat GE 8x60K Microarray (Agilent Technologies). Values were expressed as a means±SD of 3 independent experiments. Transcript Profiling of microarray data was submitted (accession number: E-MTAB-2081, <http://www.ebi.ac.uk/arrayexpress/>). For reference, values of HSC-2 cell line obtained from database of ArrayExpress (<http://www.ebi.ac.uk/arrayexpress/>) were listed. Recognition motifs by each integrin and the expression intensity values of collagen, fibronectin and vitronectin were also listed for reference. Substrates and inhibitors (TIMPs) corresponding to each MMP were also listed for reference.

| Gene symbols          | Expression intensity value |                       | Data base | Recognition motif     |
|-----------------------|----------------------------|-----------------------|-----------|-----------------------|
|                       | aHSC                       | Rat (HSC-2 cell line) |           |                       |
| Integrin $\alpha$ 1   | 72600±8113                 | 184                   |           |                       |
| Integrin $\alpha$ 11  | 3506±298                   | 5207                  |           | GFOGER<br>DGEA        |
| Integrin $\alpha$ 2   | 303±50                     |                       |           |                       |
| Integrin $\alpha$ 10  | 19±4                       |                       |           |                       |
| Integrin $\beta$ 1    | 29417±3337                 | 8359                  |           | GFOGER<br>DGEA<br>RGD |
| Integrin $\beta$ 5    | 6537±1431                  | 1723                  |           |                       |
| Integrin $\alpha$ 8   | 4024±665                   | 775                   |           |                       |
| Integrin $\beta$ 3    | 669±160                    |                       |           |                       |
| Integrin $\alpha$ 5   | 616±12                     | 673                   |           | RGD                   |
| Integrin $\alpha$ V   | 496±34                     |                       |           |                       |
| Integrin $\alpha$ IIb | 139±24                     | 78                    |           |                       |
| Integrin $\beta$ 6    | 105±5                      | 20                    |           |                       |
| Integrin $\beta$ 8    | 18±6                       |                       |           |                       |
| Col1a1                | 207281±23874               | 23206                 |           |                       |
| Col1a2                | 242181±38750               | 27233                 |           |                       |
| Fibronectin           | 111334±2159                | 12465                 |           |                       |
| Vitronectin           | 5±1                        | 35                    |           |                       |
